# Supplementary material
Source: Springer Nature journal article supplement (https://www.springermedizin.de/resource/supplementary/13063_2014_2213_MOESM2_ESM.pdf/9621650)
Supplement: MOESM2 [file 9621650]

Intervention communities

Monthly Community based screening and treatment for malaria in pregnancy

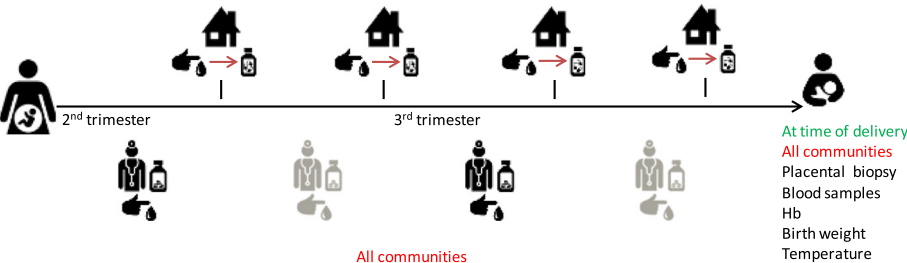

ANC visits: Enrolment onto study, IPTp, blood samples for malaria diagnosis and health checks
